# Supplementary material
Source: Springer Nature journal article supplement (https://www.springermedizin.de/resource/supplementary/12967_2011_762_MOESM4_ESM.pdf/9577454)

A

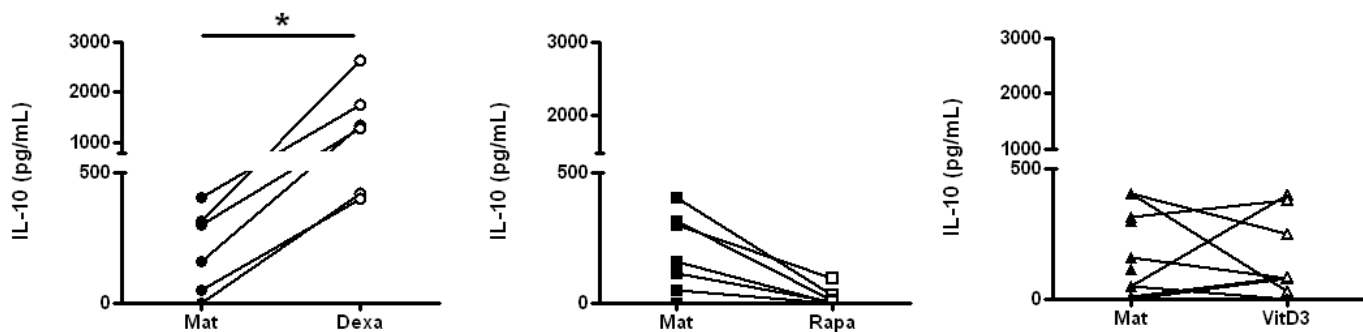

B

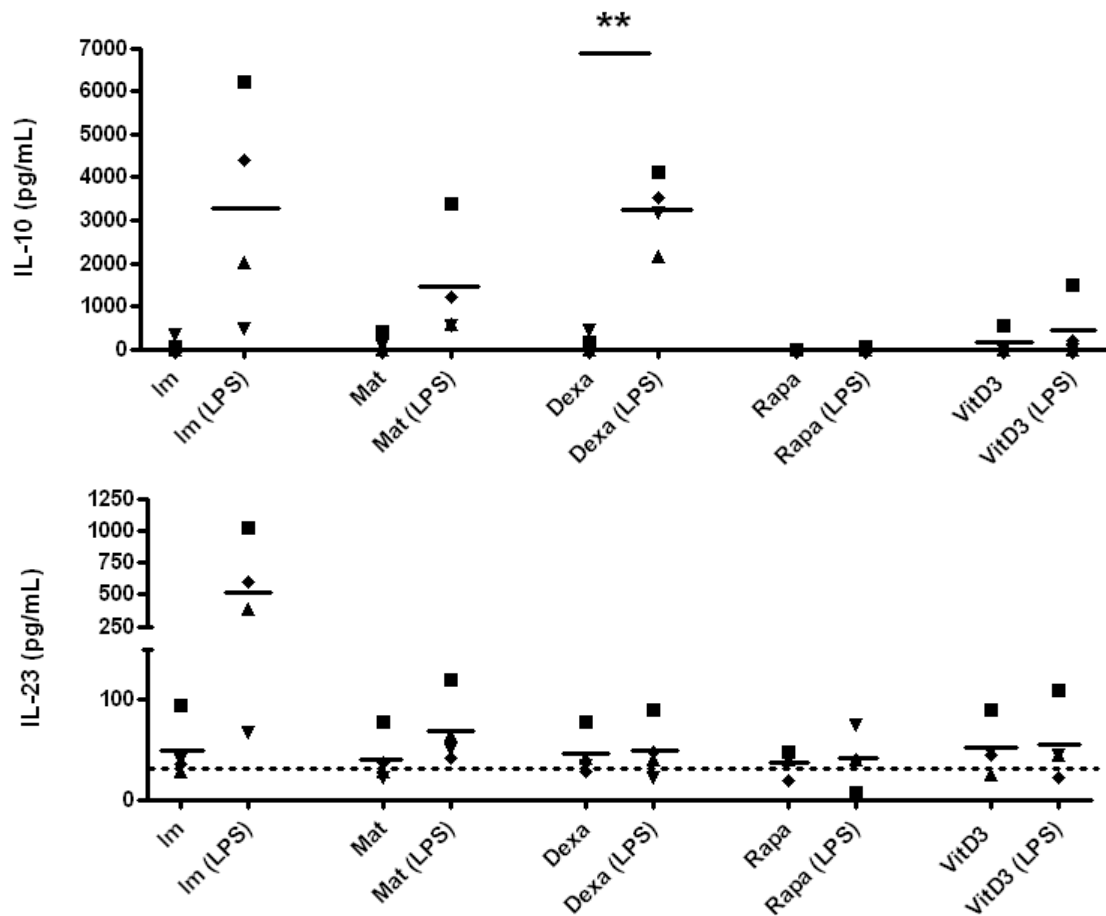

Supplement: MOESM4 [file 9577454]
